# Supplementary material for: The predictive value of urinary kidney injury molecular-1 for long-term graft function in kidney transplant patients: a prospective study
Source: PubMed Central journal article supplement — Ann Transl Med. 2021 Feb;9(3):244. doi: 10.21037/atm-20-2215a (PMC7940918; doi:10.21037/atm-20-2215a), 2021-02
Supplement: atm-09-03-244-supplementary.pdf [file atm-09-03-244-supplementary.pdf]

| Risk Factor For fDGF                       | Univariate HR(95% CI) | P-value | Multivariate HR(95% CI) | P-value |
|--------------------------------------------|-----------------------|---------|-------------------------|---------|
| uKIM-1/uCr(ng/mmol) 0 hour postoperative   | 1.327(1.131-1.558)    | 0.001** | 1.272(1.070-1.512)      | 0.006** |
| uKIM-1/uCr(ng/mmol) 1st day postoperative  | 1.327(1.177-1.495)    | 0.000** | 1.235(1.087-1.402)      | 0.001** |
| uL-FABP/uCr(ng/mmol) 0 hour postoperative  | 1.013(1.005-1.022)    | 0.002** |                         |         |
| uL-FABP/uCr(ng/mmol) 3rd day postoperative | 1.011(1.003-1.018)    | 0.005** |                         |         |

Figure S1 Univariate and multivariate Cox regression analysis in fDGF among recipients. \*\*, P<0.01. HR, hazard ratio; 95% CI, 95% confidence interval; fDGF, functional delayed graft function.

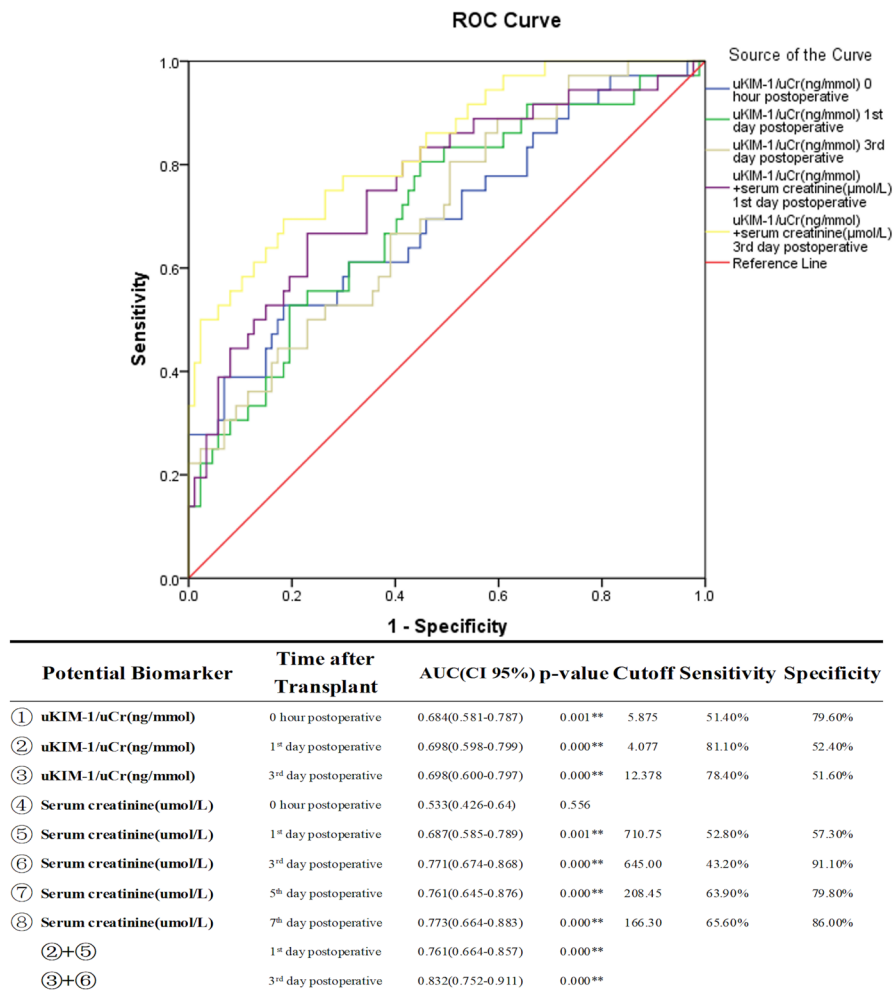

Figure S2 Receiver operating characteristic curves and areas under the curves for predicting fDGF. \*, P<0.05; \*\*, P<0.01. fDGF, functional delayed graft function; ROC, receiver operating characteristic curves; AUC, area under curve; 95% CI, 95% confidence interval; uKIM-1, urinary kidney injury molecular 1; uCr, urinary creatinine; uKIM-1/uCr, the ratio of uKIM-1 to uCr.

**Table S1** Characteristics of donors at baseline

| Characteristics                        | Total (n=140)       | fDGF (n=37)         | IGF (n=103)         | P value |
|----------------------------------------|---------------------|---------------------|---------------------|---------|
| Sex male, n (%)                        | 94 (67.1)           | 16 (43.2)           | 78 (75.7)           | 0.000*  |
| Age                                    | 43.00 (30.00–50.00) | 48.50 (31.75–54.25) | 40.00 (29.00–50.00) | 0.161   |
| Hypertension, n (%)                    | 34 (24.3)           | 12 (32.4)           | 22 (21.4)           | 0.178   |
| ICU length of stay (days)              | 2.00 (1.00–3.00)    | 2.00 (1.00–3.00)    | 0.00 (0.00–00.00)   | 0.128   |
| Serum creatinine ( $\mu\text{mol/L}$ ) | 84.23 $\pm$ 9.04    | 96.77 $\pm$ 39.31   | 77.47 $\pm$ 40.89   | 0.321   |
| Neutrophil (%)                         | 83.60 (66.55–88.85) | 83.65 (46.60–89.65) | 83.10 (77.7–89.10)  | 0.871   |
| Lymphocyte (%)                         | 10.80 (6.75–22.70)  | 11.50 (5.48–43.45)  | 10.80 (7.70–11.70)  | 0.828   |
| WBC ( $\times 10^9/\text{L}$ )         | 10.86 (5.92–17.64)  | 11.89 (6.23–27.40)  | 10.86 (5.3–15.14)   | 0.625   |
| UAlb (mg/L)                            | 10.00 (0.00–72.50)  | 40.00 (0.00–93.75)  | 0.00 (0.00–25.00)   | 0.408   |

Data that conform to a normal distribution are represented by the mean  $\pm$  standard deviation (SD), and non-normally distributed data are represented by the median (interquartile range). Frequency of occurrence of the event is expressed as the frequency (percentage). \*,  $P < 0.05$ . fDGF, functional delayed graft function; IGF, immediate graft function; ICU, intensive care unit; WBC, white blood cells; UAlb, urinary albumin.

**Table S2** Cause of recipients' ESRD before kidney transplantation

| Cause of ESRD | Total (n=140) | fDGF (n=37) | IGF (n=103) | P value |
|---------------|---------------|-------------|-------------|---------|
| GCN           | 34 (25.60)    | 13 (36.10)  | 21 (21.60)  | 0.261   |
| IgAN          | 28 (21.10)    | 4 (11.10)   | 24 (24.70)  |         |
| PKD           | 4 (3.00)      | 1 (2.80)    | 3 (3.10)    |         |
| CPN           | 3 (2.30)      | 2 (5.60)    | 1 (1.00)    |         |
| MsPGN         | 2 (1.50)      | 1 (2.80)    | 1 (1.00)    |         |
| Others        | 6 (4.50)      | 2 (5.60)    | 4 (4.10)    |         |
| Unknown       | 61 (43.60)    | 14 (37.80)  | 47 (45.60)  |         |
| HSPN          | 2 (1.50)      | 0 (0.00)    | 2 (2.10)    |         |

Frequency of occurrence of the event is expressed as the frequency (percentage). ESRD, end-stage renal disease; fDGF, functional delayed graft function; IGF, immediate graft function; GCN, chronic glomerulonephritis; IgAN, IgA nephritis; PKD, polycystic kidney disease; CPN, chronic pyelonephritis; MsPGN, mesangial proliferative glomerulonephritis; Others, include diabetic nephritis, kidney carcinoma, obesity-related glomerulopathy, aristolochic acid nephropathy and thrombotic microangiopathy; HSPN, Henoch-Schönlein purpura nephritis.

**Table S3** eGFR at last follow-up visit between the fDGF and the IGF group

| eGFR at last visit ( $\text{mL}/\text{min}/1.73 \text{ m}^2$ ) | Total (n=140) | fDGF (n=37) | IGF (n=103) | P value |
|----------------------------------------------------------------|---------------|-------------|-------------|---------|
| >90                                                            | 34 (24.30)    | 7 (18.90)   | 27 (26.20)  | 0.004*  |
| (60,90]                                                        | 64 (45.70)    | 13 (35.10)  | 51 (49.50)  |         |
| (30,60]                                                        | 31 (22.10)    | 10 (27.00)  | 21 (20.40)  |         |
| (15,30]                                                        | 2 (1.40)      | 0 (0.00)    | 2 (1.90)    |         |
| $\leq 15$                                                      | 9 (6.40)      | 7 (18.90)   | 2 (1.90)    |         |

Frequency of occurrence of the event is expressed as the frequency (percentage). \*,  $P < 0.05$ . eGFR, estimated glomerular filtration rate; fDGF, functional delayed graft function; IGF, immediate graft function.

**Table S4** Comparison of outcomes between the fDGF and the IGF group

| Adverse Events | Total (n=140) | fDGF (n=37) | IGF (n=103) | P value |
|----------------|---------------|-------------|-------------|---------|
| Death          | 3 (2.1)       | 2 (5.4)     | 1 (1.0)     | 0.110   |
| Graft loss     | 9 (6.4)       | 7 (18.9)    | 2 (1.9)     | 0.000*  |

Frequency of occurrence of the event is expressed as the frequency (percentage). \*, P<0.05. fDGF, functional delayed graft function; IGF, immediate graft function.

**Table S5** Comparison of serum biomarker levels between the fDGF group and the IGF group

| Biomarker      | Time after transplant | Total (n=140)                 | fDGF (n=37)                   | IGF (n=103)                   | P value |
|----------------|-----------------------|-------------------------------|-------------------------------|-------------------------------|---------|
| sKIM-1 (ng/L)  | 0 hour postoperative  | 88.496±24.683                 | 83.745±18.806                 | 90.202±26.350                 | 0.113   |
|                | 1st day postoperative | 80.196 (66.098–105.589)       | 73.700 (66.409–97.155)        | 87.515 (66.000–110.071)       | 0.078   |
|                | 3rd day postoperative | 91.075 (70.209–111.417)       | 83.270 (66.488–98.908)        | 93.917 (70.713–116.045)       | 0.091   |
| sL-FABP (µg/L) | 0 hour postoperative  | 1,062.729 (914.637–1,293.076) | 1,059.133 (906.646–1,313.145) | 1,065.819 (914.926–1,293.768) | 0.942   |
|                | 1st day postoperative | 1,110.767±216.103             | 1,136.704±191.614             | 1,101.450±224.389             | 0.397   |
|                | 3rd day postoperative | 1,103.278 (917.872–1,301.071) | 1,082.246 (965.968–1,281.048) | 1,110.274 (896.099–1,315.960) | 0.762   |
| sNGAL (ng/L)   | 0 hour postoperative  | 8.106 (6.965–9.522)           | 7.542 (6.795–9.139)           | 8.239 (7.038–9.570)           | 0.210   |
|                | 1st day postoperative | 7.901 (6.987–9.374)           | 7.595 (6.642–9.348)           | 8.033 (7.044–9.396)           | 0.422   |
|                | 3rd day postoperative | 8.273 (7.041–9.497)           | 8.000 (6.810–9.294)           | 8.637 (7.165–9.564)           | 0.358   |
| sNAG (ng/L)    | 0 hour postoperative  | 216.370 (172.497–269.175)     | 217.620 (183.707–263.619)     | 215.120 (168.585–273.913)     | 0.531   |
|                | 1st day postoperative | 192.798 (166.463–254.948)     | 192.551 (166.072–225.441)     | 193.016 (166.696–265.487)     | 0.177   |
|                | 3rd day postoperative | 217.552 (185.456–262.482)     | 209.392 (184.908–252.720)     | 222.870 (185.399–265.962)     | 0.322   |

Data that conform to a normal distribution are represented by the mean ± standard deviation (SD), and non-normally distributed data are represented by the median (interquartile range). fDGF, functional delayed graft function; IGF, immediate graft function; sKIM-1, serum kidney injury molecular 1; sL-FABP, serum L-type fatty acid binding protein; sNGAL, serum neutrophil gelatinase-related lipoprotein; sNAG, serum N-acetyl-β-D glucosaminidase.

**Table S6** Spearman's correlation coefficients between urinary biomarkers and traditional serum creatinine at different timepoints post transplantation

| Biomarker                 | Time after transplant | uKIM-1/uCr             | uKIM-1/uCr              | uKIM-1/uCr              | uL-FABP/uCr            | uL-FABP/uCr             | uL-FABP/uCr             |
|---------------------------|-----------------------|------------------------|-------------------------|-------------------------|------------------------|-------------------------|-------------------------|
|                           |                       | (0 hour postoperative) | (1st day postoperative) | (3rd day postoperative) | (0 hour postoperative) | (1st day postoperative) | (3rd day postoperative) |
| Serum creatinine (µmol/L) | 0 hour postoperative  | 0.056                  | 0.003                   | 0.091                   | -0.010                 | 0.046                   | 0.023                   |
|                           | 1st day postoperative | 0.112                  | 0.128                   | 0.185*                  | 0.054                  | 0.099                   | 0.115                   |
|                           | 3rd day postoperative | 0.052                  | 0.256*                  | 0.119                   | 0.031                  | 0.099                   | 0.072                   |
|                           | 5th day postoperative | 0.092                  | 0.247*                  | 0.188                   | 0.115                  | 0.153                   | 0.150                   |
|                           | 7th day postoperative | 0.158                  | 0.335**                 | 0.172                   | 0.128                  | 0.155                   | 0.130                   |

\*P<0.05; \*\*P<0.001. uKIM-1, urinary kidney injury molecular 1; uCr, urinary creatinine; uL-FABP, urinary L-type fatty acid binding protein; uKIM-1/uCr, the ratio of uKIM-1 to uCr; uL-FABP/uCr, the ratio of uL-FABP to uCr.
